# Supplementary material for: Altered DNA repair pathway engagement by engineered CRISPR-Cas9 nucleases
Source: PubMed Central journal article supplement — Proc Natl Acad Sci U S A. 2023 Mar 7;120(11):e2300605120. doi: 10.1073/pnas.2300605120 (PMC10242711; doi:10.1073/pnas.2300605120), 2023-03-07
Supplement: pnas.2300605120.sapp.pdf [file pnas.2300605120.sapp.pdf]

## Supporting Information

### **Altered DNA repair pathway engagement by engineered CRISPR-Cas9 nucleases**

Vikash P. Chauhan <sup>1,2</sup>, Phillip A. Sharp <sup>1,2\*</sup>, and Robert Langer <sup>1,3\*</sup>

<sup>1</sup> *Koch Institute for Integrative Cancer Research, Massachusetts Institute of Technology, Cambridge, Massachusetts, USA.*

<sup>2</sup> *Department of Biology, Massachusetts Institute of Technology, Cambridge, Massachusetts, USA.*

<sup>3</sup> *Department of Chemical Engineering, Massachusetts Institute of Technology, Cambridge, Massachusetts, USA.*

\* *Correspondence to: [sharppa@mit.edu](mailto:sharppa@mit.edu) (PAS), [rlanger@mit.edu](mailto:rlanger@mit.edu) (RL)*

## Supporting Figures

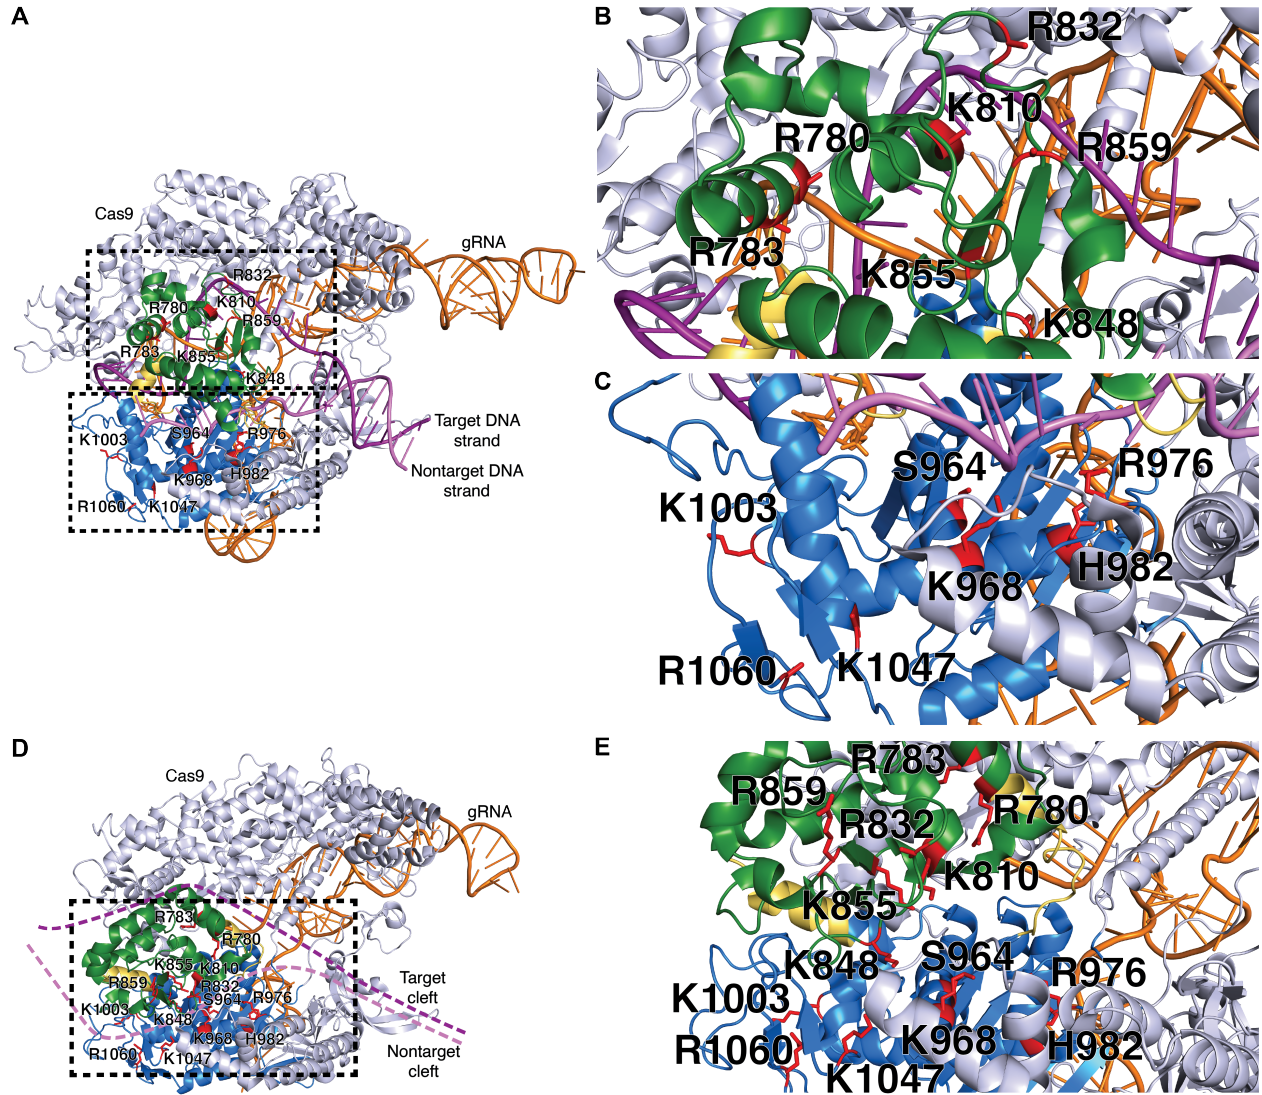

**Figure S1. Detailed views of mutated Cas9 residues.** (A) Wide view of Cas9 residues at the interface with the substrate DNA strands that were selected for mutation and screening. The mutated residues (red) are located in either the mobile HNH domain (green) or the immobile RuvC domain (blue), which are connected by linkers (yellow). (B) Focused view of the residues from A in the target cleft. (C) Focused view of the residues from A in the nontarget cleft. (D) Location of the same Cas9 residues in a structure of Cas9 without the DNA substrate bound. (E) Focused view of the residues from D in the nontarget cleft.

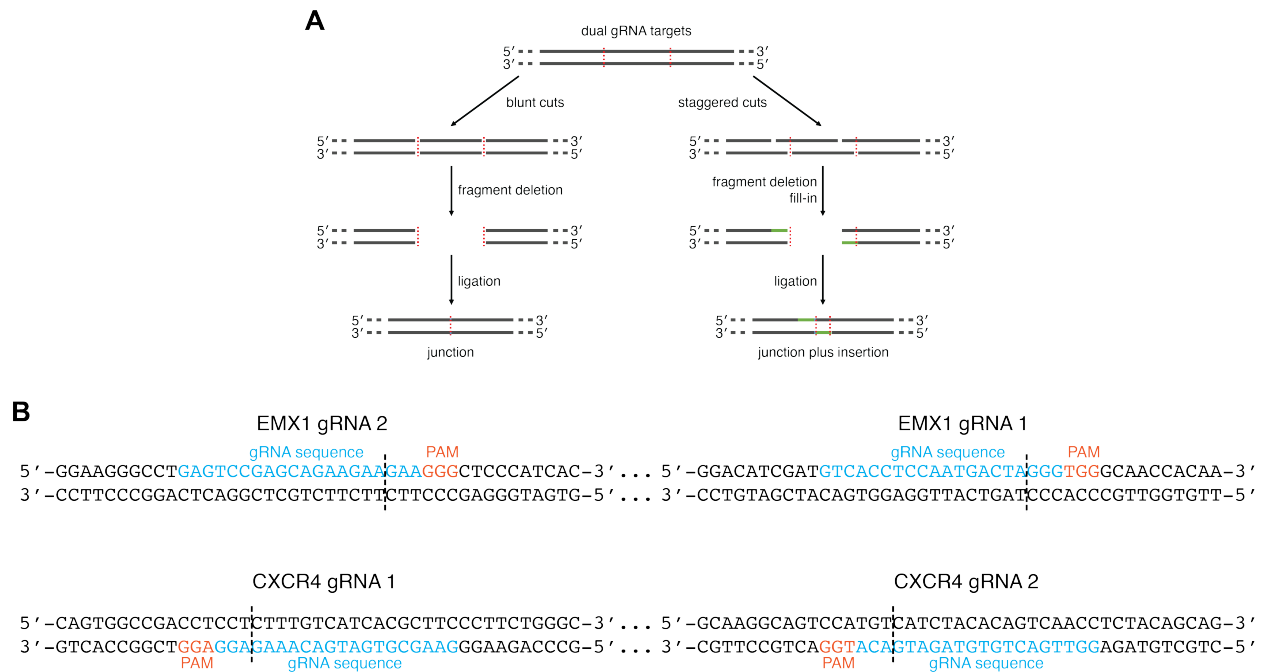

**Figure S2. Assay for determining DNA break structure induced by Cas9 variants. (A)** Assay for DNA break structure, where paired DSBs lead to perfect deletion junctions for blunt cuts and insertions in the deletion junctions for staggered cuts. The sequences of the insertions indicate cut positions in each strand. **(B)** Design of gRNA pairs to introduce deletion junctions.

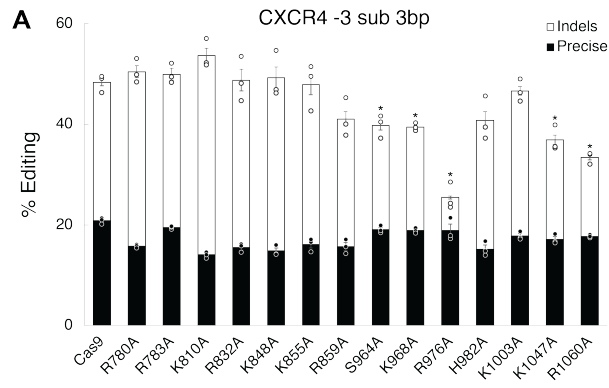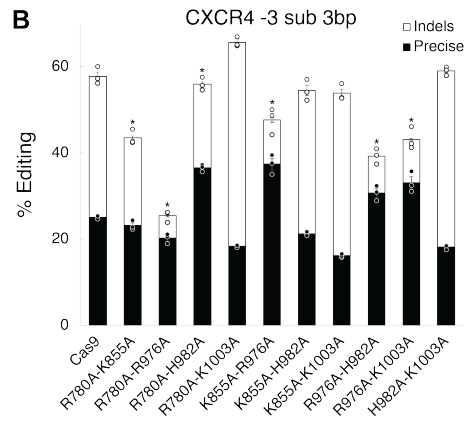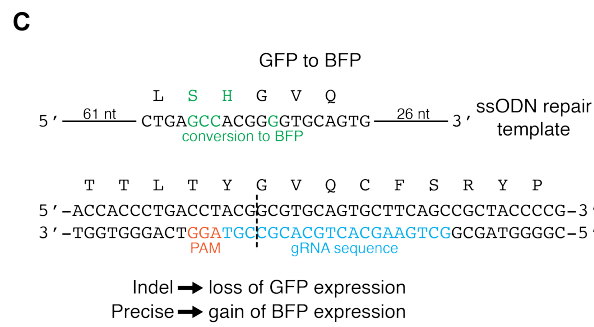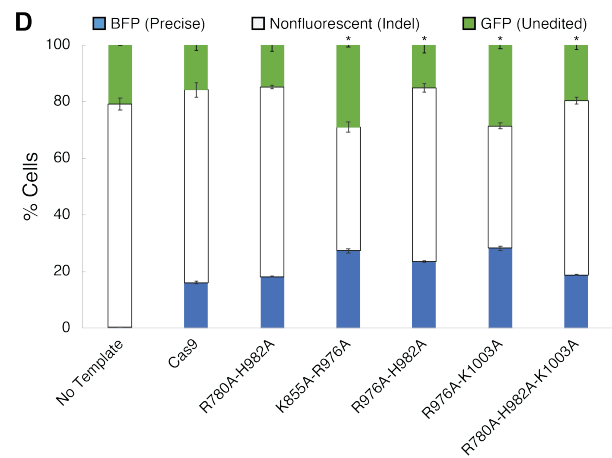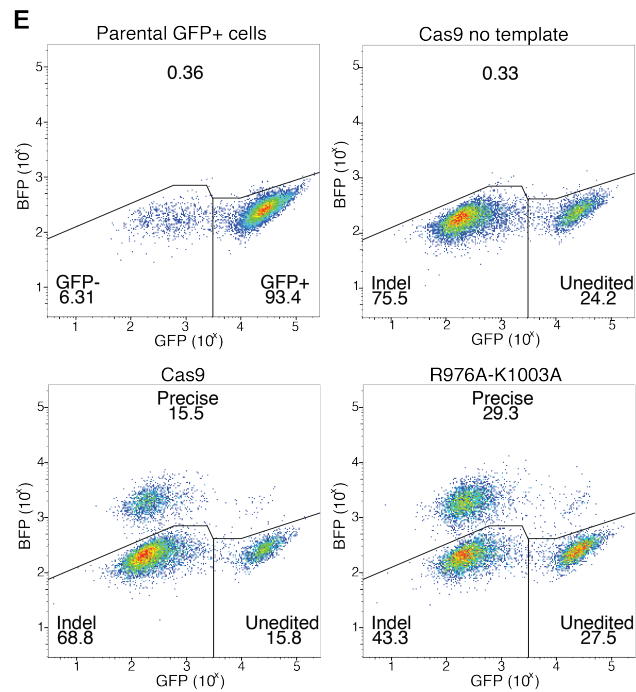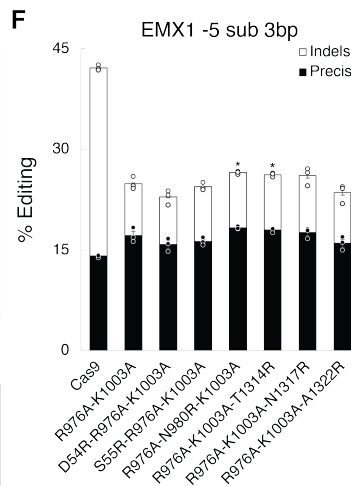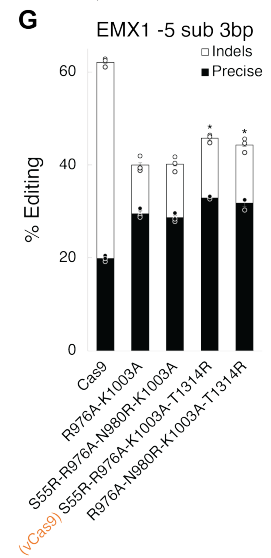

**Figure S3. Rational engineering produces Cas9 variants with increased HDR frequency. (A, B)** Screen of precise editing and indel frequencies for engineered Cas9 **(A)** single-mutant and **(B)** double-mutant variants using an HDR template. **(C)** Design of a gRNA and HDR template to introduce a GFP to BFP conversion. **(D)** Frequency of precise gene conversion from GFP to BFP. **(E)** Flow cytometry plots showing BFP-positive (indicating precise edits), nonfluorescent (indicating indels), and GFP-positive (indicating unedited cells) cell population fractions. **(F, G)** Screen of precise editing and indel frequencies for engineered Cas9 **(F)** triple-mutant and **(G)** quadruple-mutant variants using an HDR template. \* indicates  $p < 0.05$  for precise editing frequency compared to wild-type Cas9 in **A, B, D** or for total editing frequency compared to wild-type Cas9 in **F, G**. Data were analyzed by deep sequencing in **A, B, F, G** or flow cytometry in **D, E** and represent means of  $n = 3$  independent replicates with standard errors.

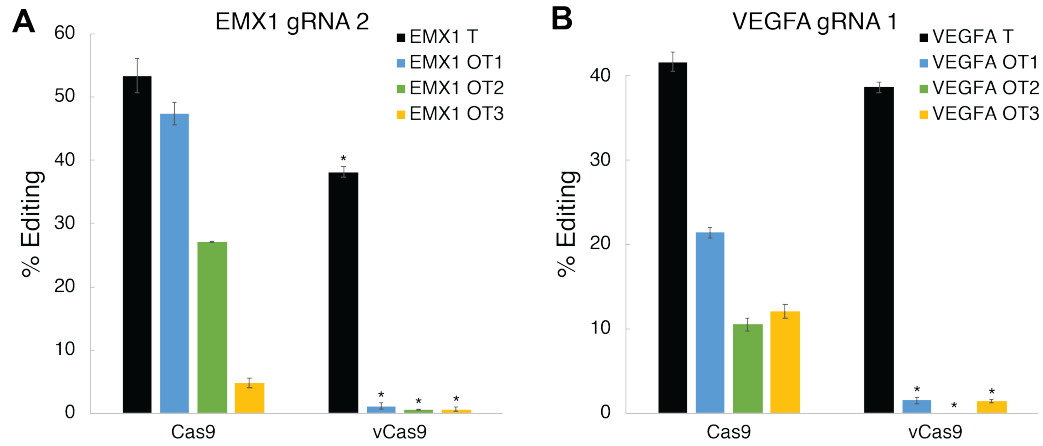

**Figure S4. vCas9 improves on-target versus off-target editing specificity. (A, B)** Indel frequencies at on-target (T) and off-target (OT1-OT3) loci. \* indicates  $p < 0.05$  for indel frequency compared to wild-type Cas9. Data were analyzed by Sanger sequencing and represent means of  $n = 2-3$  independent replicates with standard errors.

**A**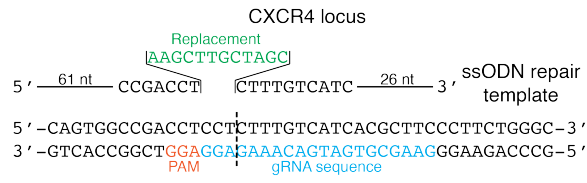**B**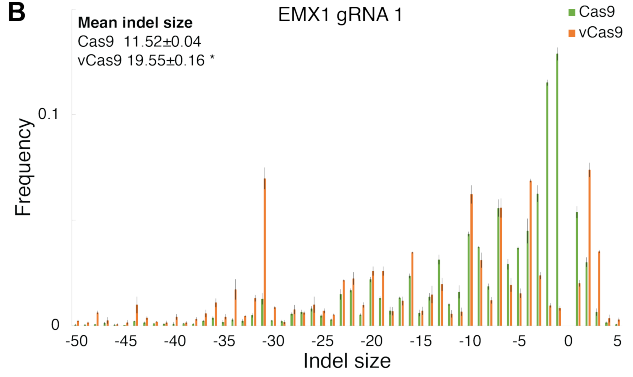**C**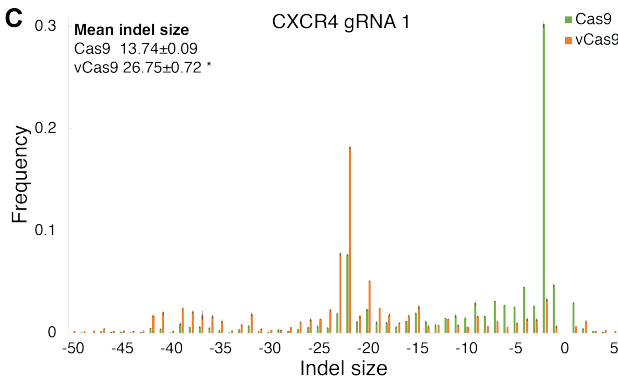**D**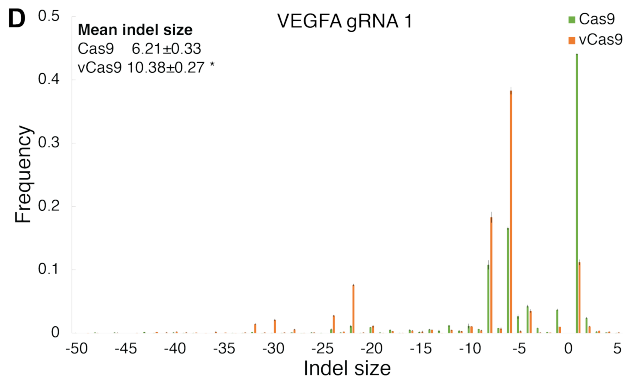**E**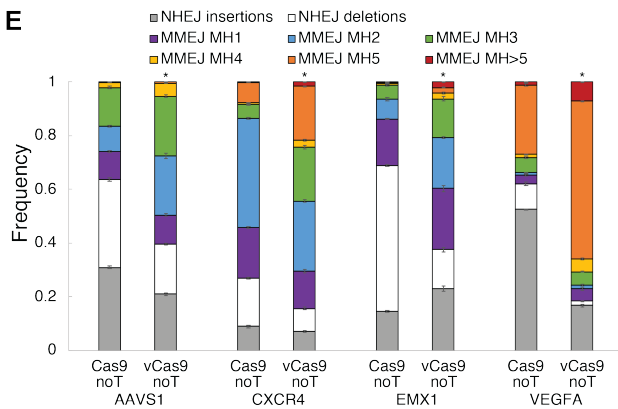**F**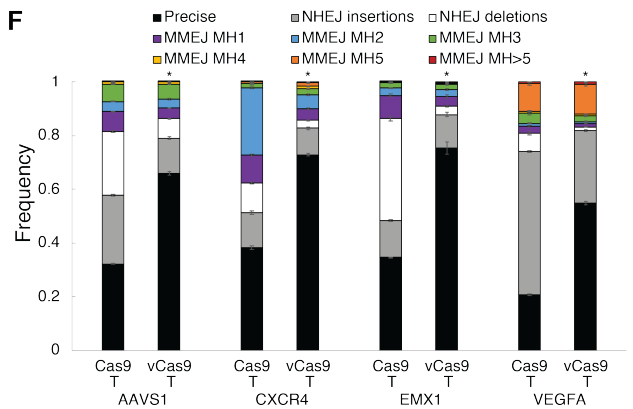**G**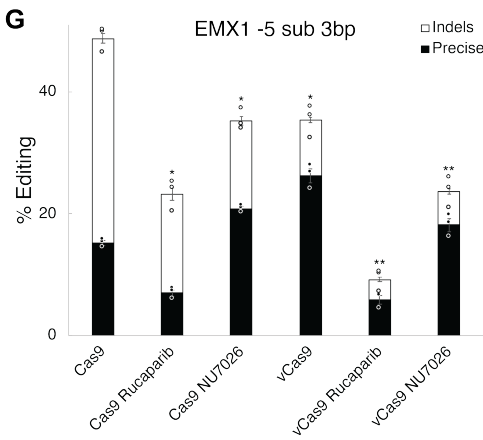**H**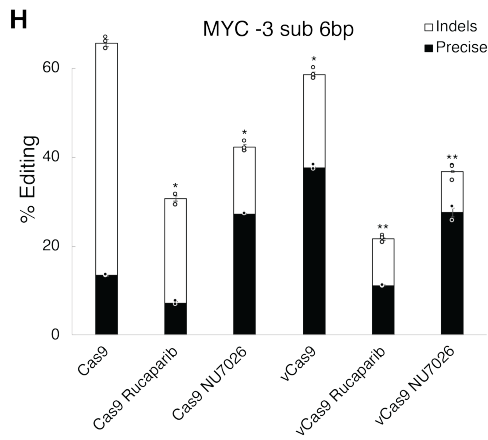

**Figure S5. Engineered Cas9 variants suppress small NHEJ indels and promote larger MMEJ indels.**

(A) Design of a gRNA and HDR template to introduce precise edits. (B-D) Distributions of indel sizes induced. (E, F) Frequencies of repair pathways engaged (E) without (noT) and (F) with (T) a repair template at several loci. NHEJ mutations are subset into insertions or deletions, while MMEJ mutations are subset by microhomology length (MH1 to MH>5). (G, H) Precise editing and indel frequencies using HDR templates without or with an MMEJ inhibitor (Rucaparib) or NHEJ inhibitor (NU7026). \* indicates  $p < 0.05$  for indel size compared to wild-type Cas9 in B-D, for NHEJ frequency compared to wild-type Cas9 in E, F, or for precise editing frequency compared to wild-type Cas9 in G, H. \*\* indicates  $p < 0.05$  for precise editing frequency compared to vCas9. Data were analyzed by deep sequencing and represent means of  $n = 3$  independent replicates with standard errors.





**Figure S6. vCas9 suppresses NHEJ and promotes MMEJ. (A, B)** Rates of the top sequences resulting from editing with Cas9 variants at the (A) EMX1 and (B) AAVS1 loci. Substitutions, insertions, and deletions are depicted. Deletions at microhomologies are labeled. The most frequent fifteen sequences are displayed along with percentages out of all sequencing reads. Data were analyzed by deep sequencing and represent a single replicate.

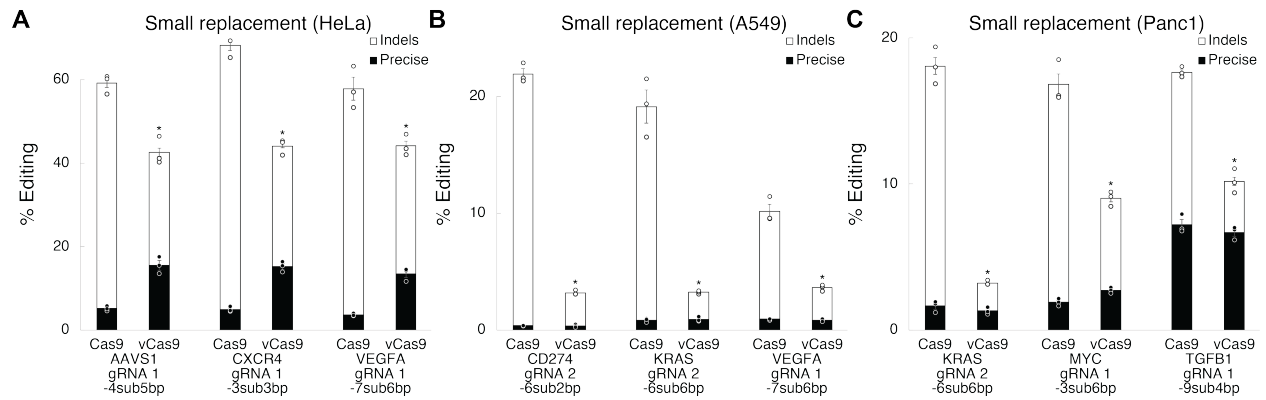

**Figure S7. vCas9 enhances precise editing and suppresses indels across cell types.** (A-C) Precise editing and indel frequencies using small replacement (<10 bp) HDR templates at several loci in (A) HeLa, (B) A549, and (C) Panc1 cells. \* indicates  $p < 0.05$  for precise editing frequency compared to wild-type Cas9. Data were analyzed by deep sequencing and represent means of  $n = 3$  independent replicates with standard errors.

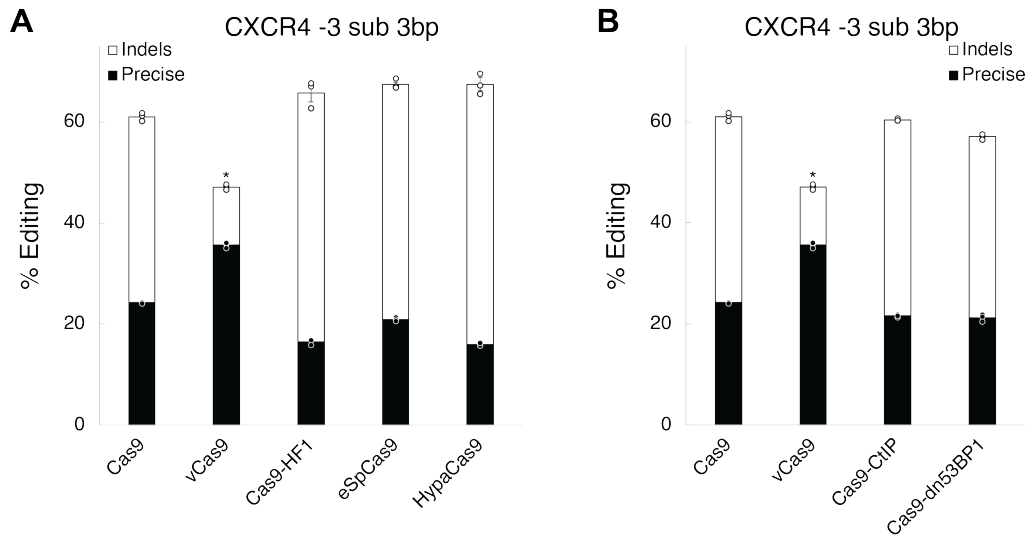

**Figure S8. vCas9 enhances precise editing versus other Cas9 variants and fusions. (A, B)** Precise editing and indel frequencies using an HDR template. \* indicates  $p < 0.05$  for precise editing frequency compared to wild-type Cas9. Data were analyzed by deep sequencing and represent means of  $n = 3$  independent replicates with standard errors.

**A**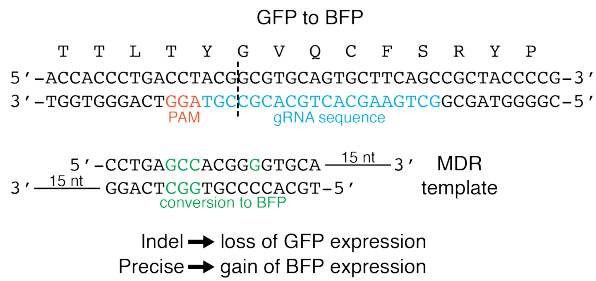**B**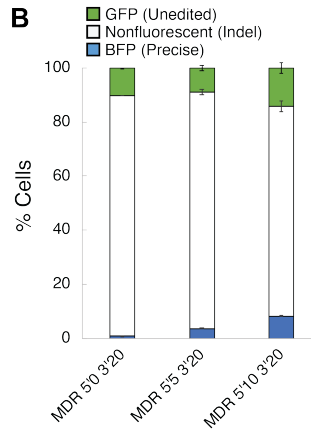**C**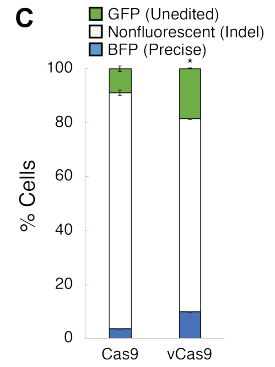

**Figure S9. MDR enables efficient precise editing through MMEJ. (A)** Design of a gRNA and MDR template to introduce a GFP to BFP conversion. **(B)** Precise editing and indel frequencies using MDR templates with varied microhomology arm lengths (0-10 bp at the 5' ends, 20 bp at the 3' ends). **(C)** Frequency of precise gene conversion from GFP to BFP. Data were analyzed by flow cytometry and represent means of  $n = 3$  independent replicates with standard errors.

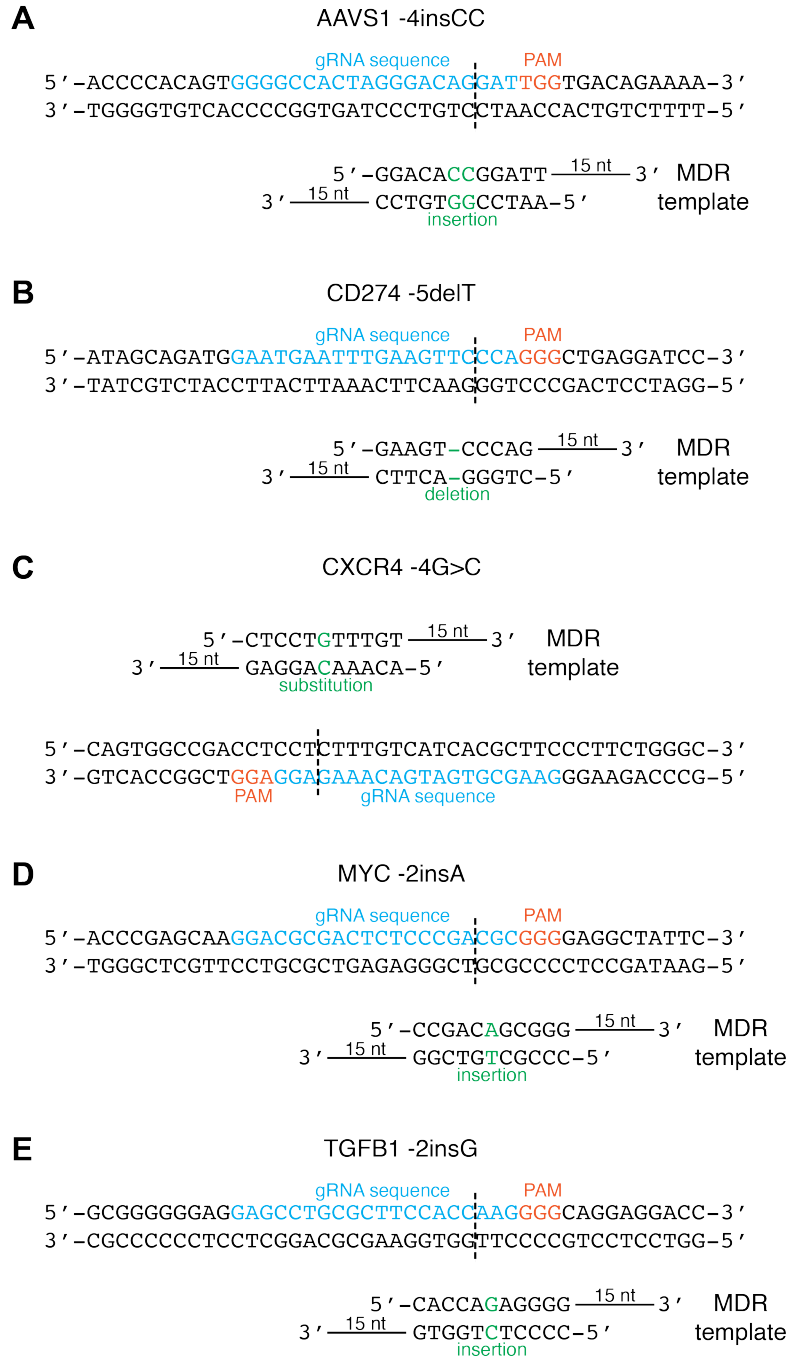

**Figure S10. Additional designs for precise editing through MMEJ by MDR. (A-E)** Design of gRNAs and MDR templates to introduce precise edits.

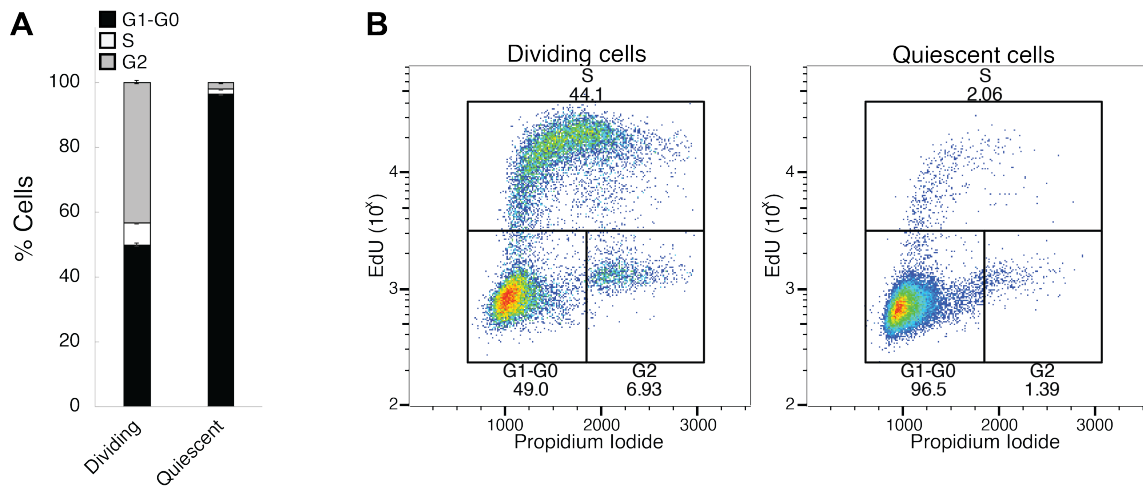

**Figure S11. Quiescent primary human dermal fibroblasts are nearly all non-dividing. (A)** Cell cycle profiling of dividing and quiescent primary human dermal fibroblasts. **(B)** Flow cytometry plots showing EdU-high (indicating S phase), Propidium Iodide-high (indicating G2 phase), and EdU-low Propidium Iodide-low (indicating G1 or G0 phase) cell population fractions. All data were analyzed by flow cytometry and represent means of  $n = 3$  independent replicates with standard errors.

## Supporting Tables

| Name            | Sequence (5' - 3')                                 |
|-----------------|----------------------------------------------------|
| cas9-mut-FWD    | GGTTGGACCGGTGCCACC                                 |
| cas9-mid-REV    | GGCCAGAGGGCCCACGTAGTAGG                            |
| cas9-mid-FWD    | CCTACTACGTGGGCCCTCTGGCC                            |
| cas9-mut-REV    | CTCTAGGAATTCTTACTTTTTCTTTTTGCCTGGCC                |
| R780A-BOT       | CCCTCTTCGATCCGCTTCATGGCCTCGCGGCTGTTCTTCTGTCC       |
| R780A-TOP       | GGACAGAAGAACAGCCGCGAGGCCATGAAGCGGATCGAAGAGGG       |
| R783A-BOT       | GCTCTTTGATGCCCTCTTCGATGGCCTTCATTCTCTCGCGGCTGTTCC   |
| R783A-TOP       | GAACAGCCGCGAGAGAATGAAGGCCATCGAAGAGGGCATCAAAGAGC    |
| K810A-BOT       | TCTGCAGGTAGTACAGGTACAGGGCCTCGTTCTGCAGCTGGGTGTTT    |
| K810A-TOP       | AAACACCCAGCTGCAGAACGAGGCCCTGTACCTGTACTACCTGCAGA    |
| R832A-BOT       | CCACATCGTAGTCCGACAGGGCGTTGATGTCCAGTTCCTGGTCC       |
| R832A-TOP       | GGACCAGGAACTGGACATCAACGCCCTGTCCGACTACGATGTGG       |
| K848A-BOT       | CCTTGTTGTCGATGGAGTCGTCGGCCAGAAAGCTCTGAGGCACGATA    |
| K848A-TOP       | TATCGTGCCTCAGAGCTTTCTGGCCGACGACTCCATCGACAACAAGG    |
| K855A-BOT       | TTGTCGCTTCTGGTCAGCACGGCGTTGTCGATGGAGTCGTCCT        |
| K855A-TOP       | AGGACGACTCCATCGACAACGCCGTGCTGACCAGAAGCGACAA        |
| S964A-BOT       | AAATCCTTCCGGAATCGGGCCACCAGCTTGGACTTCAG             |
| S964A-TOP       | CTGAAGTCCAAGCTGGTGGCCGATTTCCGGAAGGATTT             |
| K968A-BOT       | CGCACTTTGTAAACTGGAAATCGGCCCGGAAATCGGACACCAGCTTGG   |
| K968A-TOP       | CCAAGCTGGTGTCCGATTTCCGGGCCGATTTCCAGTTTTACAAAGTGCG  |
| R976A-BOT       | GCGTGGTGGTAGTTGTTGATCTCGGCCACTTTGTAAACTGGAAATCCT   |
| R976A-TOP       | AGGATTTCCAGTTTTACAAAGTGGCCGAGATCAACAACCTACCACCACGC |
| H982A-BOT       | GTAGGCGTCGTGGGCGTGGGCGTAGTTGTTGATCTCGCG            |
| H982A-TOP       | CGCGAGATCAACAACCTACGCCACGCCACGACGCCTAC             |
| K1003A-BOT      | CGTACACGAACTCGCTTTCCAGGGCAGGGTACTTTTTGATCAGGGCG    |
| K1003A-TOP      | CGCCCTGATCAAAAAGTACCCTGCCCTGGAAAGCGAGTTCGTGTACG    |
| K1047A-BOT      | GCCGTTGGCCAGGGTAATCTCGGTGGCGAAAAGTTCATGATGTTGCTG   |
| K1047A-TOP      | CAGCAACATCATGAACTTTTTCGCCACCGAGATTACCCTGGCCAACGGC  |
| R1060A-BOT      | CCGTTTGTCTCGATCAGAGGGGCTTCCGGATCTCGCCGTTGG         |
| R1060A-TOP      | CCAACGGCGAGATCCGGAAGGCCCTCTGATCGAGACAAACGG         |
| R976A-H982A-BOT | GTAGGCGTCGTGGGCGTGGGCGTAGTTGTTGATCTCGGC            |
| R976A-H982A-TOP | GCCGAGATCAACAACCTACGCCACGCCACGACGCCTAC             |
| D54R-BOT        | CGGCTGTTTCGCCGCTCCGGAACAGCAGGGCTCCG                |
| D54R-TOP        | CGGAGCCCTGCTGTTCCGGAGCGGCGAAACAGCCG                |
| S55R-BOT        | CTCGGCTGTTTCGCCCGGTGCAACAGCAGGGC                   |
| S55R-TOP        | GCCCTGCTGTTTCGACCGGGGCGAAACAGCCGAG                 |
| N980R-BOT       | CGTCGTGGGCGTGGTGGTACCGGTTGATCTCGGCCACTTTG          |



|            |                                                   |
|------------|---------------------------------------------------|
| N980R-TOP  | CAAAGTGGCCGAGATCAACCGGTACCACCACGCCACGACG          |
| T1314R-BOT | CAGGGGCTCCCAGATTGGTCAGCCGAAACAGGTGGATGATATTCTCG   |
| T1314R-TOP | CGAGAATATCATCCACCTGTTTCGGCTGACCAATCTGGGAGCCCCTG   |
| N1317R-BOT | AGGCGGCAGGGGCTCCCAGCCGGTCAGGGTAAACAGGTGG          |
| N1317R-TOP | CCACCTGTTTACCCTGACCCGGCTGGGAGCCCCTGCCGCCT         |
| A1322R-BOT | GTGGTGTCAAAGTACTTGAAGGCCCGAGGGGCTCCCAGATTGGTCAGGG |
| A1322R-TOP | CCCTGACCAATCTGGGAGCCCCTCGGGCCTTCAAGTACTTTGACACCAC |

**Table S1. Oligodeoxynucleotide sequences used for mutagenesis and cloning.**

| <b>Name</b>             | <b>Sequence (5' - 3')</b>                     |
|-------------------------|-----------------------------------------------|
| gRNA-scaffold-NheI-FWD  | CTCAGCTAGCGAGGGCCTATTTCCCATGATTCCCTTCATATTTGC |
| gRNA-scaffold-EcoRI-REV | ATCAGAATTCAAAAAAGCACCGACTCGGTGCCACTT          |
| AAVS1-gRNA1-BOT         | AAACCTAGGGACAGGATTGGTGAC                      |
| AAVS1-gRNA1-TOP         | CACCGTCACCAATCCTGTCCCTAG                      |
| AAVS1-gRNA2-BOT         | AAACATCCTGTCCCTAGTGGCCCC                      |
| AAVS1-gRNA2-TOP         | CACCGGGGCCACTAGGGACAGGAT                      |
| ASNS-gRNA1-BOT          | AAACTGCGCCCCGCGCCAGCATCC                      |
| ASNS-gRNA1-TOP          | CACCGGATGCTGGCGCGGGGCGCA                      |
| CD274-gRNA1-BOT         | AAACGGGAACCTTCAAATTCATTCC                     |
| CD274-gRNA1-TOP         | CACCGGAATGAATTTGAAGTTCCC                      |
| CD274-gRNA2-BOT         | AAACTGGGAACCTTCAAATTCATTCC                    |
| CD274-gRNA2-TOP         | CACCGAATGAATTTGAAGTTCCCA                      |
| CXCR4-gRNA1-BOT         | AAACCCTCTTTGTCATCACGCTTC                      |
| CXCR4-gRNA1-TOP         | CACCGAAGCGTGATGACAAAGAGG                      |
| EMX1-gRNA1-BOT          | AAACCCCTAGTCATTGGAGGTGAC                      |
| EMX1-gRNA1-TOP          | CACCGTCACCTCCAATGACTAGGG                      |
| EMX1-gRNA2-BOT          | AAACTTCTTCTTCTGCTCGGACTC                      |
| EMX1-gRNA2-TOP          | CACCGAGTCCGAGCAGAAGAAGAA                      |
| GFP-gRNA1-BOT           | AAACACGGCGTGCAAGTGCTTCAGC                     |
| GFP-gRNA1-TOP           | CACCGCTGAAGCACTGCACGCCGT                      |
| HOTAIR-gRNA1-BOT        | AAACCACCGCAGTTCTAGGCAAGC                      |
| HOTAIR-gRNA1-TOP        | CACCGCTTGCTAGAACTGCGGTG                       |
| KRAS-gRNA1-BOT          | AAACCGATTATTATCAGCCTCAGC                      |
| KRAS-gRNA1-TOP          | CACCGCTGAGGCTGATAATAATCG                      |
| KRAS-gRNA2-BOT          | AAACCCCCGATTATTATCAGCCTC                      |
| KRAS-gRNA2-TOP          | CACCGAGGCTGATAATAATCGGGG                      |
| MYC-gRNA1-BOT           | AAACGCGTCGGGAGAGTCGCGTCC                      |
| MYC-gRNA1-TOP           | CACCGGACGCGACTCTCCCGACGC                      |
| MYC-gRNA2-BOT           | AAACCGCGTCGGGAGAGTCGCGTC                      |
| MYC-gRNA2-TOP           | CACCGACGCGACTCTCCCGACGCG                      |
| MYC-gRNA3-BOT           | CACCGCGACTCTCCCGACGCGGGG                      |
| MYC-gRNA3-TOP           | AAACCCCCGCGTCGGGAGAGTCGC                      |
| STAT1-gRNA1-BOT         | AAACCCAGCTGCAAGCATGTCATC                      |
| STAT1-gRNA1-TOP         | CACCGATGACATGCTTGCAGCTGG                      |
| STAT1-gRNA2-BOT         | AAACCAGCTGCAAGCATGTCATCC                      |
| STAT1-gRNA2-TOP         | CACCGGATGACATGCTTGCAGCTG                      |
| TGFB1-gRNA1-BOT         | AAACCTTGGTGGAAGCGCAGGCTC                      |
| TGFB1-gRNA1-TOP         | CACCGAGCCTGCGCTTCCACCAAG                      |
| THORLNC-gRNA1-BOT       | AAACCTTTGTTACATCATCTCAC                       |

|                   |                          |
|-------------------|--------------------------|
| THORLNC-gRNA1-TOP | CACCGTGAGATGATGTGAACAAAG |
| TP53-gRNA1-BOT    | AAACTCCAGGTCCCCAGCCCAACC |
| TP53-gRNA1-TOP    | CACCGGTTGGGCTGGGGACCTGGA |
| VEGFA-gRNA1-BOT   | AAACCACGCACACACTCACTCACC |
| VEGFA-gRNA1-TOP   | CACCGGTGAGTGAGTGTGTGCGTG |
| VEGFA-gRNA2-BOT   | AAACACACGCACACACTCACTCAC |
| VEGFA-gRNA2-TOP   | CACCGTGAGTGAGTGTGTGCGTGT |

**Table S2. Oligodeoxynucleotide sequences used for gRNA cloning.**

| Name                             | Sequence (5' - 3')                                                                                                         |
|----------------------------------|----------------------------------------------------------------------------------------------------------------------------|
| AAVS1-HDRtemplate                | CAGGGCCGGTTAATGTGGCTCTGGTTCTGGGTACTTTTATCTGTCCCCTCC<br>ACCCACAGTGGGGCCGCTAGCAAGCTTGGACAGGATTGGTGACAGAAA<br>AGCCCCATCCTTAG  |
| CD274-HDRtemplate                | TATGAAAGATAATGAAAAGCTATGGGAAAGATAACTTAGAAACAAAGAAGG<br>CATGGATCCTCAGCCCTGGGCTAGCAAGCTTCAAATTCATTCCATCTGCTA<br>TATAAGAAACA  |
| CXCR4-HDRtemplate                | ATGGGTACCAGAAGAACTGAGAAGCATGACGGACAAGTACAGGCTGCA<br>CCTGTCAGTGGCCGACCTGCTAGCAAGCTTCTTTGTCATCACGCTTCCCTT<br>CTGGGCAGTTGATGC |
| EMX1-HDRtemplate                 | CTTGGGCCACGCAGGGCCTGGCCAGCAGCAAGCAGCACTCTGCCCTC<br>GTGGGTTTGTGGTTGCCACCCTAGCAAGCTTGTCAATTGGAGGTGACAT<br>CGATGTCCTCCCCATTG  |
| GFP-BFP-HDRtemplate              | CCTGAAGTTCATCTGCACCACCGGCAAGCTGCCCGTGCCCTGGCCCACC<br>CTCGTGACCACCTGAGCCACGGGGTGCAGTGCTTCAGCCGCTACCCCG<br>ACCACATGA         |
| KRAS-HDRtemplate                 | GGCGACTTCGGGGACTTAGGGAGACCGGGCGGACGATTTCCACACCGG<br>GGCTGTCTGATCGCCGGCTAGCAAGCTTATTATCAGCCTCAGCACTTGGG<br>CTGGGAATTTAG     |
| MYC-HDRtemplate                  | AGCCTTTCAGAGAAGCGGGTCTGGCAGCGGCGGGGAAGTGTCCCCAAA<br>TGGGCAGAATAGCCTCGCTAGCAAGCTTCGGGAGAGTGCAGTCTTGGCTC<br>GGGTGTTGTAAGT    |
| STAT1-HDRtemplate                | GTATTTCTAATAGACTTGAAAGGACAGCCAGGAGCAAAGATGGGCAGAAG<br>GACAACCTGTTTCCCCAAGCTTGTAGCAAGCATGTCATCCTCACATTTGG<br>CCCCTTGGCCC    |
| TGFB1-HDRtemplate                | ACCCTGAGAGGAACTGGGACTTTGGGGTCCAGACTGCCAGCGTTTAGCG<br>CAGCGGGTCTCCTGCCCCTTGAAGCTTGTAGCGCAGGCTCCTCCC<br>CCCGCGCGTGGCAC       |
| VEGFA-HDRtemplate                | ACACACAGATCTATTGGAATCCTGGAGTGACCCCTGGCCTTCTCCCCGCT<br>CCAACGCCCTCAACCCACGCTAGCAAGCTTACACTCACTCACCCACACA<br>GACACACACGTCC   |
| HOTAIR-INStemplate-BOT           | TAGAAGTGCACACAAAAAACCAACACACAGATCTAATGAAAATAAAGAT<br>CTTTATTGTGTGGAAGGCGCTGCCCG                                            |
| HOTAIR-INStemplate-TOP           | CCTCCACACAATAAAAGATCTTTATTTTCATTAGATCTGTGTGTTGTTTTT<br>TGTGTGCGCAGTTCTAGGCAAGCACT                                          |
| THORLNC-INStemplate-BOT          | TTTCCCCCTTACACAAAAAACCAACACACAGATCTAATGAAAATAAAGATC<br>TTTTATTTGTTACATCATCTCACAAA                                          |
| THORLNC-INStemplate-TOP          | GATGTGAACAATAAAAGATCTTTATTTTCATTAGATCTGTGTGTTGTTTTT<br>TGTGTGAAGGGGGAAAAGTCAATCCA                                          |
| AAVS1-MDRtemplate-BOT            | AATCCGGTGTCCCTAGTGGCCCCACTG                                                                                                |
| AAVS1-MDRtemplate-TOP            | GGACACCGGATTGGTGACAGAAAAGCC                                                                                                |
| CD274-MDRtemplate-BOT            | CTGGGACTTCAAATTCATTCCATCT                                                                                                  |
| CD274-MDRtemplate-TOP            | GAAGTCCCAGGGCTGAGGATCCATG                                                                                                  |
| CXCR4-MDRtemplate-BOT            | ACAAACAGGAGGTGGCCACTGACAG                                                                                                  |
| CXCR4-MDRtemplate-TOP            | CTCCTGTTTGTATCACGCTTCCCTT                                                                                                  |
| GFP-BFP-5'0-3'20-MDRtemplate-BOT | CCCGTGGCTCAGGGTGGTCACGAGGGTG                                                                                               |

|                                   |                                        |
|-----------------------------------|----------------------------------------|
| GFP-BFP-5'0-3'20-MDRtemplate-TOP  | GCCACGGGGTGCAGTGCTTCAGCCGCTA           |
| GFP-BFP-5'5-3'20-MDRtemplate-BOT  | TGCACCCCGTGGCTCAGGGTGGTCACGAGGGTG      |
| GFP-BFP-5'5-3'20-MDRtemplate-TOP  | CCTGAGCCACGGGGTGCAGTGCTTCAGCCGCTA      |
| GFP-BFP-5'10-3'20-MDRtemplate-BOT | AGCACTGCACCCCGTGGCTCAGGGTGGTCACGAGGGTG |
| GFP-BFP-5'10-3'20-MDRtemplate-TOP | ACCACCCTGAGCCACGGGGTGCAGTGCTTCAGCCGCTA |
| KRAS-MDRtemplate-BOT              | CCGCCTAGATTATTATCAGCCTCAGCA            |
| KRAS-MDRtemplate-TOP              | TAATCTAGGCGGCGATCAGACAGCCCC            |
| MYC-MDRtemplate-BOT               | CCCGCTGTCGGGAGAGTCGCGTCCTT             |
| MYC-MDRtemplate-TOP               | CCGACAGCGGGGAGGCTATTCTGCCC             |
| TGFB1-MDRtemplate-BOT             | CCCCTCTGGTGGGAAGCGCAGGCTCCT            |
| TGFB1-MDRtemplate-TOP             | CACCAGAGGGGCAGGAGGACCCCGCT             |

**Table S3. Oligodeoxynucleotide sequences used for HDR and MDR templates.**

| Name              | Sequence (5' - 3')                                            |
|-------------------|---------------------------------------------------------------|
| AAVS1-seq-r1-FWD  | ACACTCTTTCCCTACACGACGCTCTTCCGATCTNTCACGGTTAATGTGGCTCTGGTTCTGG |
| AAVS1-seq-r2-FWD  | ACACTCTTTCCCTACACGACGCTCTTCCGATCTNAGTCGGTTAATGTGGCTCTGGTTCTGG |
| AAVS1-seq-r3-FWD  | ACACTCTTTCCCTACACGACGCTCTTCCGATCTNCAGCGGTTAATGTGGCTCTGGTTCTGG |
| AAVS1-seq-REV     | GACTGGAGTTCAGACGTGTGCTCTTCCGATCTGGGGTTAGACCCAATATCAGGAGACTAG  |
| ASNS-seq-r1-FWD   | ACACTCTTTCCCTACACGACGCTCTTCCGATCTNGACTTACAGGAGCCAGGTCGGTAT    |
| ASNS-seq-r2-FWD   | ACACTCTTTCCCTACACGACGCTCTTCCGATCTNTGATTACAGGAGCCAGGTCGGTAT    |
| ASNS-seq-r3-FWD   | ACACTCTTTCCCTACACGACGCTCTTCCGATCTNACTTTACAGGAGCCAGGTCGGTAT    |
| ASNS-seq-REV      | GACTGGAGTTCAGACGTGTGCTCTTCCGATCTGTCAGGTGCGTAAACAATCGC         |
| CD274-seq-r1-FWD  | ACACTCTTTCCCTACACGACGCTCTTCCGATCTNATCTGTATGTCTGCTGTGTACTTTGC  |
| CD274-seq-r2-FWD  | ACACTCTTTCCCTACACGACGCTCTTCCGATCTNCGATGTATGTCTGCTGTGTACTTTGC  |
| CD274-seq-r3-FWD  | ACACTCTTTCCCTACACGACGCTCTTCCGATCTNTAGTGTATGTCTGCTGTGTACTTTGC  |
| CD274-seq-REV     | GACTGGAGTTCAGACGTGTGCTCTTCCGATCTACTTAACAAATGGTGGTTGTCTAAA     |
| CXCR4-seq-r1-FWD  | ACACTCTTTCCCTACACGACGCTCTTCCGATCTNCGTTGGTCATGGGTTACCAGAAGA    |
| CXCR4-seq-r2-FWD  | ACACTCTTTCCCTACACGACGCTCTTCCGATCTNACGTGGTCATGGGTTACCAGAAGA    |
| CXCR4-seq-r3-FWD  | ACACTCTTTCCCTACACGACGCTCTTCCGATCTNGTATGGTCATGGGTTACCAGAAGA    |
| CXCR4-seq-REV     | GACTGGAGTTCAGACGTGTGCTCTTCCGATCTGACTGATGAAGGCCAGGATG          |
| EMX1-seq-r1-FWD   | ACACTCTTTCCCTACACGACGCTCTTCCGATCTNGACCCTGAGTCCGAGCAGAAGAA     |
| EMX1-seq-r2-FWD   | ACACTCTTTCCCTACACGACGCTCTTCCGATCTNTGACCTGAGTCCGAGCAGAAGAA     |
| EMX1-seq-r3-FWD   | ACACTCTTTCCCTACACGACGCTCTTCCGATCTNACTCCTGAGTCCGAGCAGAAGAA     |
| EMX1-seq-REV      | GACTGGAGTTCAGACGTGTGCTCTTCCGATCTAGTGGCCAGAGTCCAGCTT           |
| GFP-seq-r1-FWD    | ACACTCTTTCCCTACACGACGCTCTTCCGATCTNATGCGTAAACGGCCACAAGTTCAGC   |
| GFP-seq-r2-FWD    | ACACTCTTTCCCTACACGACGCTCTTCCGATCTNGATCGTAAACGGCCACAAGTTCAGC   |
| GFP-seq-r3-FWD    | ACACTCTTTCCCTACACGACGCTCTTCCGATCTNTGCCGTAACGGCCACAAGTTCAGC    |
| GFP-seq-REV       | GACTGGAGTTCAGACGTGTGCTCTTCCGATCTTAGTTGCCGTCGTCCTTGAAGA        |
| HOTAIR-seq-r1-FWD | ACACTCTTTCCCTACACGACGCTCTTCCGATCTNGACCAGTCAAATCTGGCAGAGAGCAG  |
| HOTAIR-seq-r2-FWD | ACACTCTTTCCCTACACGACGCTCTTCCGATCTNTGACAGTCAAATCTGGCAGAGAGCAG  |

|                    |                                                                |
|--------------------|----------------------------------------------------------------|
| HOTAIR-seq-r3-FWD  | ACACTCTTCCCTACACGACGCTCTCCGATCTNACTCAGTCAAATCTGGC<br>GAGAGCAG  |
| HOTAIR-seq-REV     | GACTGGAGTTCAGACGTGTGCTCTCCGATCTCAAATATGTGTTCCGCGG<br>GTC       |
| KRAS-seq-r1-FWD    | ACACTCTTCCCTACACGACGCTCTCCGATCTNGACTTGAAAGGGTCTGT<br>CGTGTTTG  |
| KRAS-seq-r2-FWD    | ACACTCTTCCCTACACGACGCTCTCCGATCTNTGATTGAAAGGGTCTGT<br>CGTGTTTG  |
| KRAS-seq-r3-FWD    | ACACTCTTCCCTACACGACGCTCTCCGATCTNACTTTGAAAGGGTCTGT<br>CGTGTTTG  |
| KRAS-seq-REV       | GACTGGAGTTCAGACGTGTGCTCTCCGATCTAAACAAGCAGTCACCAAAA<br>GTGG     |
| MYC-seq-r1-FWD     | ACACTCTTCCCTACACGACGCTCTCCGATCTNCGTCACGAACTTTGCC<br>CATAGCA    |
| MYC-seq-r2-FWD     | ACACTCTTCCCTACACGACGCTCTCCGATCTNACGCACGAACTTTGCC<br>CATAGCA    |
| MYC-seq-r3-FWD     | ACACTCTTCCCTACACGACGCTCTCCGATCTNGTACACGAACTTTGCC<br>CATAGCA    |
| MYC-seq-REV        | GACTGGAGTTCAGACGTGTGCTCTCCGATCTAAGTGGACTTCGGTGCTT<br>ACC       |
| STAT1-seq-r1-FWD   | ACACTCTTCCCTACACGACGCTCTCCGATCTNATGAAAGTAGTATGCGT<br>GGGCCTC   |
| STAT1-seq-r2-FWD   | ACACTCTTCCCTACACGACGCTCTCCGATCTNGATAAAGTAGTATGCGT<br>GGGCCTC   |
| STAT1-seq-r3-FWD   | ACACTCTTCCCTACACGACGCTCTCCGATCTNTGCAAAGTAGTATGCGT<br>GGGCCTC   |
| STAT1-seq-REV      | GACTGGAGTTCAGACGTGTGCTCTCCGATCTGCTCAAAGCTGGTAAAC<br>CTTCA      |
| TGFB1-seq-r1-FWD   | ACACTCTTCCCTACACGACGCTCTCCGATCTNGACGTGACTCTACAAGA<br>CCGAGGTG  |
| TGFB1-seq-r2-FWD   | ACACTCTTCCCTACACGACGCTCTCCGATCTNTGAGTGACTCTACAAGA<br>CCGAGGTG  |
| TGFB1-seq-r3-FWD   | ACACTCTTCCCTACACGACGCTCTCCGATCTNACTGTGACTCTACAAGA<br>CCGAGGTG  |
| TGFB1-seq-REV      | GACTGGAGTTCAGACGTGTGCTCTCCGATCTCCTGAGAGGAACTGGGAC<br>TTTG      |
| THORLNC-seq-r1-FWD | ACACTCTTCCCTACACGACGCTCTCCGATCTNCGTTCTCCGGAGCAGAA<br>ATAGAACAG |
| THORLNC-seq-r2-FWD | ACACTCTTCCCTACACGACGCTCTCCGATCTNACGTCTCCGGAGCAGAA<br>ATAGAACAG |
| THORLNC-seq-r3-FWD | ACACTCTTCCCTACACGACGCTCTCCGATCTNGTATCTCCGGAGCAGAA<br>ATAGAACAG |
| THORLNC-seq-REV    | GACTGGAGTTCAGACGTGTGCTCTCCGATCTTTCATGCCGTCAAGTCTCA<br>TTT      |
| TP53-seq-r1-FWD    | ACACTCTTCCCTACACGACGCTCTCCGATCTNATGATTCCATGGGACTG<br>ACTTTCTGC |
| TP53-seq-r2-FWD    | ACACTCTTCCCTACACGACGCTCTCCGATCTNGATATTCCATGGGACTG<br>ACTTTCTGC |
| TP53-seq-r3-FWD    | ACACTCTTCCCTACACGACGCTCTCCGATCTNTGCATTCCATGGGACTG<br>ACTTTCTGC |
| TP53-seq-REV       | GACTGGAGTTCAGACGTGTGCTCTCCGATCTCATCTGGACCTGGGTCTT<br>CAGT      |
| VEGFA-seq-r1-      | ACACTCTTCCCTACACGACGCTCTCCGATCTNATGGCGTCTCCGAGAGT              |

|                  |                                                               |
|------------------|---------------------------------------------------------------|
| FWD              | GAGGAC                                                        |
| VEGFA-seq-r2-FWD | ACACTCTTTCCCTACACGACGCTCTTCCGATCTNGATGCGTCTTCGAGAGT<br>GAGGAC |
| VEGFA-seq-r3-FWD | ACACTCTTTCCCTACACGACGCTCTTCCGATCTNTGCGCGTCTTCGAGAGT<br>GAGGAC |
| VEGFA-seq-REV    | GACTGGAGTTCAGACGTGTGCTCTTCCGATCTGGGGAGAGGGACACACA<br>GAT      |

**Table S4. Oligodeoxynucleotide sequences used for next-generation sequencing.**



| <b>Name</b>   | <b>Sequence (5' - 3')</b>       |
|---------------|---------------------------------|
| EMX1-T-FWD    | GGCTCCCTGGGTTCAAAGTA            |
| EMX1-T-REV    | AGAGGGGTCTGGATGTCGTAA           |
| EMX1-T-seq    | AACCCTATGTAGCCTCAGTCTTCCC       |
| EMX1-OT1-FWD  | TTATCCCCTACTCCTTCATCCCA         |
| EMX1-OT1-REV  | AAGGACAGCTTCTTATCCCTGTC         |
| EMX1-OT1-seq  | GGAGATTTGCATCTGTGGAGGC          |
| EMX1-OT2-FWD  | ACTCCTGGGACAATTATGAACGGTG       |
| EMX1-OT2-REV  | ACTATCCTTCTAGTCTTGGGCTAAATTC    |
| EMX1-OT2-seq  | GCTTCTTGTCTTTGGCTTTCTTAATGAACTG |
| EMX1-OT3-FWD  | GCACTGATTCATTAGGAGCTGG          |
| EMX1-OT3-REV  | AGTCCTATAGATTCACCCACCCA         |
| EMX1-OT3-seq  | TCCTGGTTCTGCCACTTGCTG           |
| VEGFA-T-FWD   | GCTCCAGATGGCACATTGTCAG          |
| VEGFA-T-REV   | AGGGAGCAGGAAAGTGAGGT            |
| VEGFA-T-seq   | CAAATATGTAGCTGTTTGGGAGGTCAG     |
| VEGF1-OT1-FWD | TCCCACCAAGGAGGGTTTCTT           |
| VEGFA-OT1-REV | CCTCCCTCAAGGGAAGGTTGT           |
| VEGFA-OT1-seq | CAAGTAGCTGAGATTACAGGCATGTGC     |
| VEGFA-OT2-FWD | ATTCCTCAGGTGGGTTGATGGG          |
| VEGFA-OT2-REV | AGAAAGGAGCCTCGACCAAGTC          |
| VEGFA-OT2-seq | GCCTCCCTGCTGGTTCTCAGAG          |
| VEGFA-OT3-FWD | TCCCATCCCACCTTAGTGTTCC          |
| VEGFA-OT3-REV | TAACCCAGAACATCCAGGCAAC          |
| VEGFA-OT3-seq | TACCATGAACGCAGCCATGC            |

**Table S5. Oligodeoxynucleotide sequences used for Sanger sequencing.**

## Sequences

### Cas9

ATGGACAAGAAGTACAGCATCGGCCTGGACATCGGCACCAACTCTGTGGGCTGGGCCGTGATCACC  
GACGAGTACAAGGTGCCAGCAAGAAATTCAAGGTGCTGGGCAACACCGACCGGCACAGCATCAAG  
AAGAACCTGATCGGAGCCCTGCTGTTTCGACAGCGGCGAAACAGCCGAGGCCACCCGGCTGAAGAG  
AACCGCCAGAAGAAGATACACCAGACGGAAGAACCGGATCTGCTATCTGCAAGAGATCTTCAGCAA  
CGAGATGGCCAAGGTGGACGACAGCTTCTCCACAGACTGGAAGAGTCCTTCCTGGTGGAAAGAGGA  
TAAGAAGCACGAGCGGCACCCCATCTTCGGCAACATCGTGGACGAGGTGGCCTACCACGAGAAGTA  
CCCCACCATCTACCACCTGAGAAAGAACTGGTGGACAGCACCGACAAGGCCGACCTGCGGCTGAT  
CTATCTGGCCCTGGCCACATGATCAAGTTCCGGGGCCACTTCCTGATCGAGGGCGACCTGAACCC  
CGACAACAGCGACGTGGACAAGCTGTTTCATCCAGCTGGTGCAGACCTACAACCAGCTGTTTCGAGGA  
AAACCCCATCAACGCCAGCGGCGTGGACGCCAAGGCCATCCTGTCTGCCAGACTGAGCAAGAGCA  
GACGGCTGGAAAATCTGATCGCCAGCTGCCCGGCGAGAAGAAGAATGGCCTGTTTCGAAAACCTGA  
TTGCCCTGAGCCTGGGCCTGACCCCAACTTCAAGAGCAACTTCGACCTGGCCGAGGATGCCAAAC  
TGCAGCTGAGCAAGGACACCTACGACGACGACCTGGACAACCTGCTGGCCCAGATCGGCGACCAG  
TACGCCGACCTGTTTCTGGCCGCAAGAACCTGTCCGACGCCATCCTGCTGAGCGACATCCTGAGA  
GTGAACACCGAGATACCAAGGCCCCCTGAGCGCCTCTATGATCAAGAGATACGACGAGCACCAC  
CAGGACCTGACCCTGCTGAAAGCTCTCGTGCGGCAGCAGCTGCCTGAGAAGTACAAAGAGATTTTC  
TTCGACCAGAGCAAGAACGGCTACGCCGGCTACATTGACGGCGGAGCCAGCCAGGAAGAGTTCTAC  
AAGTTCATCAAGCCCATCCTGGAAAAGATGGACGGCACCGAGGAACTGCTCGTGAAGCTGAACAGA  
GAGGACCTGCTGCGGAAGCAGCGGACCTTCGACAACGGCAGCATCCCCACCAGATCCACCTGGG  
AGAGCTGCACGCCATTCTGCGGCGGCAGGAAGATTTTTACCCATTCTGAAGGACAACCGGGAAAA  
GATCGAGAAGATCCTGACCTTCCGCATCCCCTACTACGTGGGCCCTCTGGCCAGGGGAAACAGCAG  
ATTCGCCTGGATGACCAGAAAGAGCGAGGAAACCATCACCCCTGGAACCTCGAGGAAGTGGTGG  
CAAGGGCGCTTCCGCCAGAGCTTCATCGAGCGGATGACCAACTTCGATAAAGAACCTGCCAACGA  
GAAGGTGCTGCCAAGCACAGCCTGCTGTACGAGTACTTCACCGTGTATAACGAGCTGACCAAAGT  
GAAATACGTGACCGAGGGAATGAGAAAGCCCGCCTTCCTGAGCGGCGAGCAGAAAAAGGCCATCGT  
GGACCTGCTGTTCAAGACCAACCGGAAAGTGACCGTGAAGCAGCTGAAAGAGGACTACTTCAAGAA  
AATCGAGTGCTTCGACTCCGTGGAAATCTCCGGCGTGGAAAGATCGGTTCAACGCCTCCCTGGGCAC  
ATACCACGATCTGCTGAAAATTATCAAGGACAAGGACTTCCTGGACAATGAGGAAAACGAGGACATT  
CTGGAAGATATCGTGCTGACCCTGACACTGTTTGGAGACAGAGAGATGATCGAGGAACGGCTGAAA  
ACCTATGCCACCTGTTTCGACGACAAAGTGATGAAGCAGCTGAAGCGGCGGAGATACACCGGCTGG  
GGCAGGCTGAGCCGGAAGCTGATCAACGGCATCCGGGACAAGCAGTCCGGCAAGACAATCCTGGA

TTTCCTGAAGTCCGACGGCTTCGCCAACAGAACTTCATGCAGCTGATCCACGACGACAGCCTGACC  
TTTAAAGAGGACATCCAGAAAGCCCAGGTGTCCGGCCAGGGCGATAGCCTGCACGAGCACATTGCC  
AATCTGGCCGGCAGCCCCGCCATTAAGAAGGGCATCCTGCAGACAGTGAAGGTGGTGGACGAGCT  
CGTGAAAGTGATGGGCCGGCACAAGCCCCGAGAACATCGTGATCGAAATGGCCAGAGAGAACCAGA  
CCACCCAGAAGGGACAGAAGAACAGCCGCGAGAGAATGAAGCGGATCGAAGAGGGCATCAAAGAG  
CTGGGCAGCCAGATCCTGAAAGAACACCCCGTGGAAAACACCCAGCTGCAGAACGAGAAGCTGTAC  
CTGTACTACCTGCAGAATGGGCGGGATATGTACGTGGACCAGGAACTGGACATCAACCGGCTGTCC  
GACTACGATGTGGACCATATCGTGCCTCAGAGCTTTCTGAAGGACGACTCCATCGACAACAAGGTGC  
TGACCAGAAGCGACAAGAACCAGGGGCAAGAGCGACAACGTGCCCTCCGAAGAGGTCGTGAAGAAG  
ATGAAGAACTACTGGCGGCAGCTGCTGAACGCCAAGCTGATTACCCAGAGAAAGTTCGACAATCTGA  
CCAAGGCCGAGAGAGGGCGGCCTGAGCGAACTGGATAAGGCCGGCTTCATCAAGAGACAGCTGGTG  
GAAACCCGGCAGATCACAAAGCACGTGGCACAGATCCTGGACTCCCGGATGAACACTAAGTACGAC  
GAGAATGACAAGCTGATCCGGGAAGTGAAAGTGATCACCTGAAGTCCAAGCTGGTGTCCGATTTCC  
CGGAAGGATTTCCAGTTTTACAAAGTGCGCGAGATCAACAACCTACCACCACGCCACGACGCCTACC  
TGAACGCCGTCTGTGGGAACCGCCCTGATCAAAAAGTACCCTAAGCTGGAAAGCGAGTTCGTGTACG  
GCGACTACAAGGTGTACGACGTGCGGAAGATGATCGCCAAGAGCGAGCAGGAAATCGGCAAGGCT  
ACCGCCAAGTACTTCTTCTACAGCAACATCATGAACTTTTTCAAGACCGAGATTACCCTGGCCAACG  
GCGAGATCCGGAAGCGGCCTCTGATCGAGACAAACGGCGAAACCGGGGAGATCGTGTGGGATAAG  
GGCCGGGATTTTGGCACCGTGCAGAAAGTGCTGAGCATGCCCAAGTGAATATCGTGAAAAAGACC  
GAGGTGCAGACAGGCGGCTTCAGCAAAGAGTCTATCCTGCCCAAGAGGAACAGCGATAAGCTGATC  
GCCAGAAAGAAGGACTGGGACCCTAAGAAGTACGGCGGCTTCGACAGCCCCACCGTGGCCTATTCT  
GTGCTGGTGGTGGCCAAAGTGAAAAAGGGCAAGTCCAAGAACTGAAGAGTGTGAAAGAGCTGCTG  
GGGATCACCATCATGGAAAGAAGCAGCTTCGAGAAGAATCCCATCGACTTTCTGGAAGCCAAGGGC  
TACAAAGAAGTGAAAAAGGACCTGATCATCAAGCTGCCTAAGTACTCCCTGTTTCGAGCTGGAAAACG  
GCCGGAAGAGAATGCTGGCCTCTGCCGGCGAACTGCAGAAGGGAAACGAACTGGCCCTGCCCTCC  
AAATATGTGAACTTCTGTACCTGGCCAGCCACTATGAGAAGCTGAAGGGCTCCCCGAGGATAATG  
AGCAGAAACAGCTGTTTGTGGAACAGCACAAAGCACTACCTGGACGAGATCATCGAGCAGATCAGCG  
AGTTCTCCAAGAGAGTGATCCTGGCCGACGCTAATCTGGACAAAGTGCTGTCCGCCTACAACAAGCA  
CCGGGATAAGCCATCAGAGAGCAGGCCGAGAATATCATCCACCTGTTTACCCTGACCAATCTGGG  
AGCCCCTGCCGCCTTCAAGTACTTTGACACCACCATCGACCGGAAGAGGTACACCAGCACCAAAGA  
GGTGCTGGACGCCACCCTGATCCACCAGAGCATCACCGGCCTGTACGAGACACGGATCGACCTGTC  
TCAGCTGGGAGGCGAC

Cas9<sup>S55R-R976A-K1003A-T1314R</sup> (vCas9), with mutations in red:

ATGGACAAGAAGTACAGCATCGGCCTGGACATCGGCACCAACTCTGTGGGCTGGGCCGTGATCACC  
GACGAGTACAAGGTGCCAGCAAGAAATTC AAGGTGCTGGGCAACACCGACCGGCACAGCATCAAG  
AAGAACCTGATCGGAGCCCTGCTGTTTCGACCGGGCGAAACAGCCGAGGCCACCCGGCTGAAGAG  
AACCGCCAGAAGAAGATACACCAGACGGAAGAACCGGATCTGCTATCTGCAAGAGATCTTCAGCAA  
CGAGATGGCCAAGGTGGACGACAGCTTCTTCCACAGACTGGAAGAGTCCTTCTGGTGGAAAGAGGA  
TAAGAAGCACGAGCGGCACCCCATCTTCGGCAACATCGTGGACGAGGTGGCCTACCACGAGAAGTA  
CCCCACCATCTACCACCTGAGAAAGAACTGGTGGACAGCACCGACAAGGCCGACCTGCGGCTGAT  
CTATCTGGCCCTGGCCACATGATCAAGTTCGGGGGCCACTTCTGATCGAGGGCGACCTGAACCC  
CGACAACAGCGACGTGGACAAGCTGTTCCATCCAGCTGGTGCAGACCTACAACCAGCTGTTTCGAGGA  
AAACCCCATCAACGCCAGCGGCGTGGACGCCAAGGCCATCCTGTCTGCCAGACTGAGCAAGAGCA  
GACGGCTGGAAAATCTGATCGCCAGCTGCCCGGCGAGAAGAAGAATGGCCTGTTTCGAAAACCTGA  
TTGCCCTGAGCCTGGGCCTGACCCCAACTTCAAGAGCAACTTCGACCTGGCCGAGGATGCCAAAC  
TGCAGCTGAGCAAGGACACCTACGACGACGACCTGGACAACCTGCTGGCCAGATCGGCGACCAG  
TACGCCGACCTGTTTCTGGCCGCAAGAACCTGTCCGACGCCATCCTGCTGAGCGACATCCTGAGA  
GTGAACACCGAGATCACCAAGGCCCCCTGAGCGCCTCTATGATCAAGAGATACGACGAGCACAC  
CAGGACCTGACCCTGCTGAAAGCTCTCGTGCAGCAGCTGCCTGAGAAGTACAAAGAGATTTTC  
TTCGACCAGAGCAAGAACGGCTACGCCGGCTACATTGACGGCGGAGCCAGCCAGGAAGAGTTCTAC  
AAGTTCATCAAGCCCATCCTGGAAAAGATGGACGGCACCGAGGAACTGCTCGTGAAGCTGAACAGA  
GAGGACCTGCTGCGGAAGCAGCGGACCTTCGACAACGGCAGCATCCCCACCAGATCCACCTGGG  
AGAGCTGCACGCCATTCTGCGGCGGAGGAAGATTTTTACCCATTCTGAAGGACAACCGGGAAAA  
GATCGAGAAGATCCTGACCTTCCGCATCCCCTACTACGTGGGCCCTCTGGCCAGGGGAAACAGCAG  
ATTGCCTGGATGACCAGAAAGAGCGAGGAAACCATCACCCCTGGAACCTTCGAGGAAGTGGTGG  
CAAGGGCGCTTCGCCCAGAGCTTCATCGAGCGGATGACCAACTTCGATAAGAACCTGCCAACGA  
GAAGGTGCTGCCAAGCACAGCCTGCTGTACGAGTACTTCACCGTGTATAACGAGCTGACCAAAGT  
GAAATACGTGACCGAGGGAATGAGAAAGCCCGCCTTCTGAGCGGCGAGCAGAAAAAGGCCATCGT  
GGACCTGCTGTTCAAGACCAACCGGAAAGTACCGTGAAGCAGCTGAAAGAGGACTACTTCAAGAA  
AATCGAGTGCTTCGACTCCGTGGAATCTCCGGCGTGAAGATCGGTTCAACGCCTCCCTGGGCAC  
ATACCACGATCTGCTGAAAATTATCAAGGACAAGGACTTCTGGACAATGAGGAAAACGAGGACATT  
CTGGAAGATATCGTGCTGACCCTGACACTGTTTGGAGACAGAGAGATGATCGAGGAACGGCTGAAA  
ACCTATGCCACCTGTTTCGACGACAAAGTGATGAAGCAGCTGAAGCGGCGGAGATACACCGGCTGG  
GGCAGGCTGAGCCGGAAGCTGATCAACGGCATCCGGGACAAGCAGTCCGGCAAGACAATCCTGGA  
TTTCTGAAGTCCGACGGCTTCGCCAACAGAACTTCATGCAGCTGATCCACGACGACAGCCTGACC  
TTTAAAGAGGACATCCAGAAAGCCAGGTGTCCGGCCAGGGCGATAGCCTGCACGAGCACATTGCC  
AATCTGGCCGGCAGCCCCGCCATTAAGAAGGGCATCCTGCAGACAGTGAAGGTGGTGGACGAGCT

CGTGAAAGTGATGGGCCGGCACAAGCCCGAGAACATCGTGATCGAAATGGCCAGAGAGAACCAGA  
CCACCCAGAAGGGACAGAAGAACAGCCGCGAGAGAATGAAGCGGATCGAAGAGGGCATCAAAGAG  
CTGGGCAGCCAGATCCTGAAAGAACACCCCGTGGAAAACACCCAGCTGCAGAACGAGAAGCTGTAC  
CTGTACTACCTGCAGAATGGGCGGGATATGTACGTGGACCAGGAACTGGACATCAACCGGCTGTCC  
GACTACGATGTGGACCATATCGTGCCTCAGAGCTTTCTGAAGGACGACTCCATCGACAACAAGGTGC  
TGACCAGAAGCGACAAGAACCGGGGCAAGAGCGACAACGTGCCCTCCGAAGAGGTCGTGAAGAAG  
ATGAAGAACTACTGGCGGCAGCTGCTGAACGCCAAGCTGATTACCCAGAGAAAGTTCGACAATCTGA  
CCAAGGCCGAGAGAGGGCGGCCTGAGCGAACTGGATAAGGCCGGCTTCATCAAGAGACAGCTGGTG  
GAAACCCGGCAGATCACAAAGCACGTGGCACAGATCCTGGACTCCCGGATGAACACTAAGTACGAC  
GAGAATGACAAGCTGATCCGGGAAGTGAAAGTGATCACCTGAAGTCCAAGCTGGTGTCCGATTC  
CGGAAGGATTTCCAGTTTTACAAAGTGGCCGAGATCAACAACCTACCACCACGCCACGACGCCTACC  
TGAACGCCGTCGTGGGAACCGCCCTGATCAAAAAGTACCCTGCCCTGGAAAGCGAGTTCGTGTACG  
GCGACTACAAGGTGTACGACGTGCGGAAGATGATCGCCAAGAGCGAGCAGGAAATCGGCAAGGCT  
ACCGCCAAGTACTTCTTCTACAGCAACATCATGAACTTTTTCAAGACCGAGATTACCCTGGCCAACG  
GCGAGATCCGGAAGCGGCCTCTGATCGAGACAAACGGCGAAACCGGGGAGATCGTGTGGGATAAG  
GGCCGGGATTTTGCACCGTGCGGAAAGTGCTGAGCATGCCCAAGTGAATATCGTGAAAAAGACC  
GAGGTGCAGACAGGCGGCTTCAGCAAAGAGTCTATCCTGCCAAGAGGAACAGCGATAAGCTGATC  
GCCAGAAAGAAGGACTGGGACCCTAAGAAGTACGGCGGCTTCGACAGCCCCACCGTGGCCTATTCT  
GTGCTGGTGGTGGCCAAAGTGGAAAAGGGCAAGTCCAAGAAACTGAAGAGTGTGAAAGAGCTGCTG  
GGGATCACCATCATGGAAAGAAGCAGCTTCGAGAAGAATCCCATCGACTTTCTGGAAGCCAAGGGC  
TACAAAGAAGTGA AAAAGGACCTGATCATCAAGCTGCCTAAGTACTCCCTGTTTCGAGCTGGAAAACG  
GCCGGAAGAGAATGCTGGCCTCTGCCGGCGAACTGCAGAAGGGAAACGAACTGGCCCTGCCCTCC  
AAATATGTGAACTTCTGTACCTGGCCAGCCACTATGAGAAGCTGAAGGGCTCCCCGAGGATAATG  
AGCAGAAACAGCTGTTTGTGGAACAGCACAAGCACTACCTGGACGAGATCATCGAGCAGATCAGCG  
AGTTCTCCAAGAGAGTGATCCTGGCCGACGCTAATCTGGACAAAGTGCTGTCCGCCTACAACAAGCA  
CCGGGATAAGCCCATCAGAGAGCAGGCCGAGAATATCATCCACCTGTTTCCGCTGACCAATCTGGG  
AGCCCCTGCCGCCTTCAAGTACTTTGACACCACCATCGACCGGAAGAGGTACACCAGCACCAAGA  
GGTGTGGACGCCACCCTGATCCACCAGAGCATCACCGGCCTGTACGAGACACGGATCGACCTGTC  
TCAGCTGGGAGGCGAC

gRNA cloning backbone, with U6 promoter in green and scaffold in blue:

GAGGGCCTATTTCCCATGATTCTTCATATTTGCATATACGATACAAGGCTGTTAGAGAGATAATTGG  
AATTAATTTGACTGTAAACACAAAGATATTAGTACAAAATACGTGACGTAGAAAGTAATAATTTCTTGG  
GTAGTTTGCAGTTTTAAAATTATGTTTTAAAATGGACTATCATATGCTTACCGTAACTTGAAAGTATTTG

GATTTCCTGGCTTTATATATCTTGTGGAAAGGACGAAACACCGGGTCTTCGAGAAGACCTGTTTTAGA  
GCTAGAAATAGCAAGTTAAATAAGGCTAGTCCGTTATCAACTTGAAAAAGTGGCACCGAGTCGGTG  
CTTTTTTT
